# Supplementary material for: Breast cancers with high proliferation and low ER-related signalling have poor prognosis and unique molecular features with implications for therapy
Source: PubMed Central journal article supplement (PMC10703787; doi:10.1038/s41416-023-02477-7), 2023-11-07
Supplement: 41416_2023_2477_MOESM2_ESM.pdf [file 41416_2023_2477_MOESM2_ESM.pdf]

**Supplementary Table 2. Frequency of recurrent genomic alterations in ER+/HER2- tumors stratified according to MKS and ERS status in TCGA**

| Mutation | Overall<br>(n = 640) | MKS <sup>lo</sup> /ERS <sup>hi</sup><br>(n = 209) | MKS <sup>lo</sup> /ERS <sup>lo</sup><br>(n = 129) | MKS <sup>hi</sup> /ERS <sup>hi</sup><br>(n = 146) | MKS <sup>hi</sup> /ERS <sup>lo</sup><br>(n = 156) | p-value                  |
|----------|----------------------|---------------------------------------------------|---------------------------------------------------|---------------------------------------------------|---------------------------------------------------|--------------------------|
| PIK3CA   | 39%                  | 52%                                               | 33%                                               | 32%                                               | 33%                                               | 6.47 x 10 <sup>-5</sup>  |
| TP53     | 17%                  | 6%                                                | 12%                                               | 16%                                               | 34%                                               | 8.28 x 10 <sup>-11</sup> |
| CDH1     | 15%                  | 19%                                               | 19%                                               | 9%                                                | 11%                                               | 0.013                    |
| GATA3    | 13%                  | 9%                                                | 16%                                               | 14%                                               | 15%                                               | 0.150                    |
| MAP3K1   | 9%                   | 15%                                               | 5%                                                | 11%                                               | 4%                                                | 5.85 x 10 <sup>-4</sup>  |
| MLL3     | 7%                   | 12%                                               | 3%                                                | 8%                                                | 4%                                                | 0.0091                   |
| MUC12    | 5%                   | 4%                                                | 7%                                                | 3%                                                | 6%                                                | 0.401                    |
| MAP2K4   | 5%                   | 5%                                                | 2%                                                | 8%                                                | 3%                                                | 0.119                    |
| NCOR1    | 4%                   | 5%                                                | 7%                                                | 3%                                                | 3%                                                | 0.315                    |
| SPEN     | 4%                   | 5%                                                | 5%                                                | 3%                                                | 3%                                                | 0.733                    |
| MUC4     | 4%                   | 1%                                                | 7%                                                | 5%                                                | 4%                                                | 0.057                    |
| PTEN     | 4%                   | 5%                                                | 5%                                                | 1%                                                | 5%                                                | 0.088                    |
| DMD      | 4%                   | 2%                                                | 2%                                                | 3%                                                | 8%                                                | 0.054                    |
| RUNX1    | 4%                   | 4%                                                | 7%                                                | 3%                                                | 1%                                                | 0.081                    |
| TBX3     | 3%                   | 4%                                                | 2%                                                | 5%                                                | 2%                                                | 0.196                    |
